# Supplementary material for: A coordination π–π framework exhibits spontaneous magnetization
Source: Royal Society of Chemistry journal article supplement (doi:10.1039/b515681e), 2006-01-01
Supplement: b515681e.pdf [file b515681e.pdf]

# Supplementary Material (ESI) for Chemical Communications  
# This journal is (c) The Royal Society of Chemistry 2006

Electronic Supplementary Information: **B515681E**

## **A Coordination $\pi$ - $\pi$ Framework Exhibits Spontaneous Magnetization**

Lu-Lin Li,<sup>a</sup> Kuan-Jiuh Lin\*<sup>a</sup> Chin-Jun Ho,<sup>b</sup> Chia-Pin Sun,<sup>b</sup> and Hung-Duen Yang\*<sup>b</sup>

<sup>a</sup> *Department of Chemistry, Center of Nanoscience and Nanotechnology, National*

*Chung-Hsing University, Taichung 402, Taiwan (Republic of China). E-mail:*

*kjlin@dragon.nchu.edu.tw.* <sup>b</sup> *Department of Physics, National Sun Yat-Sen University,*

*Kausiung 804, Taiwan (Republic of China).*

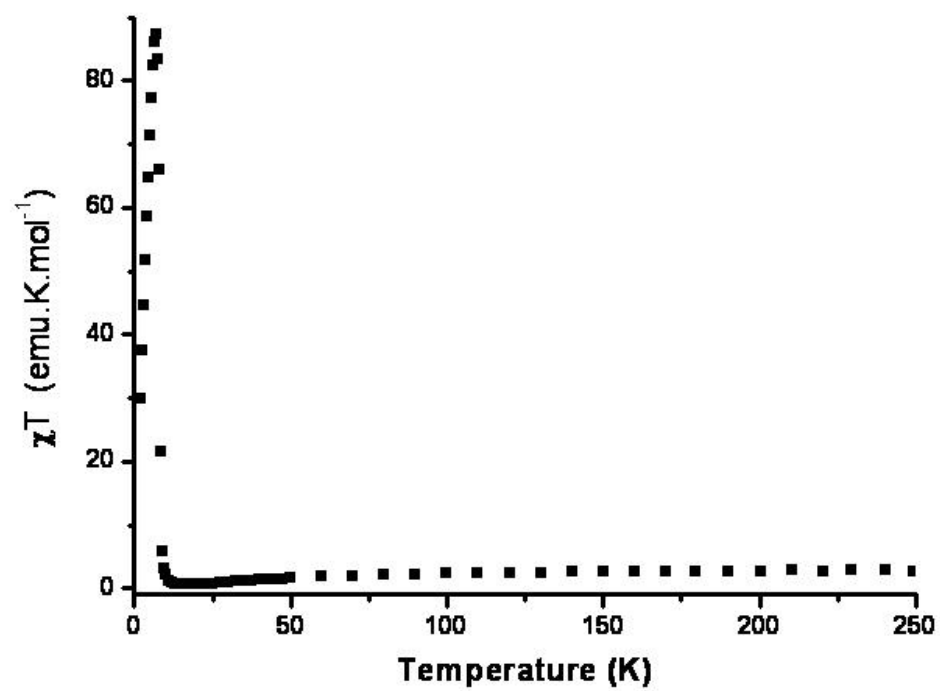

Fig. S1. Temperature dependence of  $\chi_m T$  for compound 1.
